# Supplementary material for: Dynamic FDG-PET Imaging to Differentiate Malignancies from Inflammation in Subcutaneous and In Situ Mouse Model for Non-Small Cell Lung Carcinoma (NSCLC)
Source: PubMed Central journal article supplement (PMC4589399; doi:10.1371/journal.pone.0139089), 2015-09-30
Supplement: pone.0139089.s001.pdf [file pone.0139089.s001.pdf]

## Supporting Information

**Table A. Supplementary Data of Fig. 5**

| SUVmax from Subcutaneous Groups |          |          |          |          |          |          |                    |          |         |          |                    |
|---------------------------------|----------|----------|----------|----------|----------|----------|--------------------|----------|---------|----------|--------------------|
|                                 |          |          |          |          |          | Mean     | Standard Deviation |          |         |          |                    |
| Tumor(a)                        | 1.9      | 1.9      | 1.4      | 1.9      | 1.2      | 1.66     | 0.33615            |          |         |          |                    |
| Inflammation with Tumor(c)      | 0.8      | 0.7      | 0.8      | 0.8      | --       | 0.775    | 0.05               |          |         |          |                    |
| Inflammation without Tumor(d)   | 2.5      | 2.8      | 1.8      | 2.2      | --       | 2.325    | 0.427200187265875  |          |         |          |                    |
| Ki from Subcutaneous Groups     |          |          |          |          |          |          |                    |          |         |          |                    |
|                                 |          |          |          |          |          | Mean     | Standard Deviation |          |         |          |                    |
| Tumor(a)                        | 3.59E-04 | 6.44E-04 | 3.78E-04 | 2.46E-04 | 3.47E-04 | 3.95E-04 | 1.48E-04           |          |         |          |                    |
| Inflammation with Tumor(c)      | 2.74E-04 | 2.14E-04 | 2.93E-04 | 2.14E-04 | --       | 2.49E-04 | 4.10E-05           |          |         |          |                    |
| Inflammation without Tumor(d)   | 0.0018   | 9.90E-04 | 8.81E-04 | 6.35E-04 | --       | 0.00108  | 5.04E-04           |          |         |          |                    |
| SUVmax from in situ Groups      |          |          |          |          |          |          |                    |          |         |          |                    |
|                                 |          |          |          |          |          |          |                    |          |         | Mean     | Standard Deviation |
| Tumor(b)                        | 1.6      | 2        | 1.3      | 1.6      | 1.6      | --       | --                 | --       | --      | 1.62     | 0.249              |
| Inflammation (e)                | 1.5      | 1.3      | 1.7      | 1.1      | 1.8      | 1.6      | 1.3                | 3        | 2.3     | 1.73333  | 0.58949            |
| Ki from in situ Groups          |          |          |          |          |          |          |                    |          |         |          |                    |
|                                 |          |          |          |          |          |          |                    |          |         | Mean     | Standard Deviation |
| Tumor(b)                        | 5.94E-04 | 3.98E-04 | 2.98E-04 | 5.39E-04 | 3.65E-04 | --       | --                 | --       | --      | 4.39E-04 | 1.24E-04           |
| Inflammation (e)                | 0.00119  | 7.76E-04 | 6.03E-04 | 9.49E-04 | 1.32E-04 | 9.66E-04 | 9.18E-04           | 8.23E-04 | 0.00377 | 0.00112  | 0.00103            |

**Table B. Supplementary Data of Fig. 6**

| SUVmax from Tumor Groups        |          |          |          |          |          |          |          |          |         |          |                    |
|---------------------------------|----------|----------|----------|----------|----------|----------|----------|----------|---------|----------|--------------------|
|                                 |          |          |          |          |          |          |          |          |         | Mean     | Standard Deviation |
| Subcutaneous (a)                | 1.9      | 1.9      | 1.4      | 1.9      | 1.2      | 1.66     | 0.33615  |          |         |          |                    |
| in situ (b)                     | 1.6      | 2        | 1.3      | 1.6      | 1.6      | 1.62     | 0.249    |          |         |          |                    |
| Ki from Tumor Groups            |          |          |          |          |          |          |          |          |         |          |                    |
|                                 |          |          |          |          |          |          |          |          |         | Mean     | Standard Deviation |
| Subcutaneous (a)                | 3.59E-04 | 6.44E-04 | 3.78E-04 | 2.46E-04 | 3.47E-04 | 3.95E-04 | 1.48E-04 |          |         |          |                    |
| in situ (b)                     | 5.94E-04 | 3.98E-04 | 2.98E-04 | 5.39E-04 | 3.65E-04 | 4.39E-04 | 1.24E-04 |          |         |          |                    |
| SUVmax from Inflammation Groups |          |          |          |          |          |          |          |          |         |          |                    |
|                                 |          |          |          |          |          |          |          |          |         | Mean     | Standard Deviation |
| Subcutaneous with Tumor (c)     | 0.8      | 0.7      | 0.8      | 0.8      | --       | --       | --       | --       | --      | 0.775    | 0.05               |
| Subcutaneous without Tumor (d)  | 2.5      | 2.8      | 1.8      | 2.2      | --       | --       | --       | --       | --      | 2.325    | 0.427200187265876  |
| in situ (e)                     | 1.5      | 1.3      | 1.7      | 1.1      | 1.8      | 1.6      | 1.3      | 3        | 2.3     | 1.73333  | 0.58949            |
| Spontaneous (f)                 | 1.1      | 1.6      | 1.1      | 1.5      | 1.2      | 1.9      | --       | --       | --      | 1.4      | 0.32249            |
| Ki from Inflammation Groups     |          |          |          |          |          |          |          |          |         |          |                    |
|                                 |          |          |          |          |          |          |          |          |         | Mean     | Standard Deviation |
| Subcutaneous with Tumor (c)     | 2.74E-04 | 2.14E-04 | 2.93E-04 | 2.14E-04 | --       | --       | --       | --       | --      | 2.49E-04 | 4.10E-05           |
| Subcutaneous without Tumor (d)  | 0.0018   | 9.90E-04 | 8.81E-04 | 6.35E-04 | --       | --       | --       | --       | --      | 0.00108  | 5.04E-04           |
| in situ (e)                     | 0.00119  | 7.76E-04 | 6.03E-04 | 9.49E-04 | 1.32E-04 | 9.66E-04 | 9.18E-04 | 8.23E-04 | 0.00377 | 0.00112  | 0.00103            |
| Spontaneous (f)                 | 0.00176  | 0.00343  | 0.00363  | 0.00397  | 0.00224  | 0.00477  | --       | --       | --      | 0.0033   | 0.00112            |

**Table C. Supplementary Data of Fig. 7**

| Time Activity Curves of subcutaneous tumor and in situ tumor (SUVmax) |               |                    |                    |               |                    |
|-----------------------------------------------------------------------|---------------|--------------------|--------------------|---------------|--------------------|
| in situ Tumor                                                         |               |                    | Subcutaneous Tumor |               |                    |
| Time (s)                                                              | SUVmax (mean) | Standard Deviation | Time (s)           | SUVmax (mean) | Standard Deviation |
| 1.5                                                                   | 0.06951       | 0                  | 1.5                | 8.43E-16      | 0                  |
| 3.25                                                                  | 2.03E-11      | 4.54E-11           | 3.25               | 0             | 0                  |
| 3.75                                                                  | 1.40E-16      | 1.93E-16           | 3.75               | 0             | 0                  |
| 4.25                                                                  | 1.56E-10      | 3.50E-10           | 4.25               | 4.29E-15      | 0                  |
| 4.75                                                                  | 7.08E-04      | 0.00158            | 4.75               | 4.29E-15      | 0                  |
| 5.25                                                                  | 2.52E-07      | 5.63E-07           | 5.25               | 0.00102       | 0.00145            |
| 5.75                                                                  | 0.02623       | 0.05865            | 5.75               | 0.00102       | 0.00145            |
| 6.25                                                                  | 0.07949       | 0.17773            | 6.25               | 0.00557       | 0.00764            |
| 6.75                                                                  | 0.10077       | 0.21796            | 6.75               | 0.00564       | 0.00667            |
| 7.25                                                                  | 0.29294       | 0.40338            | 7.25               | 0.0345        | 0.03443            |
| 7.75                                                                  | 0.48641       | 0.6517             | 7.75               | 0.12112       | 0.06612            |
| 8.25                                                                  | 1.31419       | 1.42823            | 8.25               | 0.15093       | 0.11669            |
| 12.25                                                                 | 2.36777       | 2.7188             | 12.25              | 0.18381       | 0.12404            |
| 17.25                                                                 | 1.70001       | 1.1548             | 17.25              | 0.17664       | 0.07712            |
| 22.25                                                                 | 1.46774       | 0.80694            | 22.25              | 0.20934       | 0.07471            |
| 27.25                                                                 | 1.21343       | 0.60589            | 27.25              | 0.19098       | 0.05832            |
| 32.25                                                                 | 1.00811       | 0.48625            | 32.25              | 0.24261       | 0.08461            |
| 37.25                                                                 | 1.04372       | 0.42419            | 37.25              | 0.28633       | 0.10628            |
| 42.25                                                                 | 0.98922       | 0.43585            | 42.25              | 0.28271       | 0.09281            |
| 49                                                                    | 0.9308        | 0.37872            | 49                 | 0.29878       | 0.11502            |
| 69                                                                    | 0.8481        | 0.32997            | 69                 | 0.2986        | 0.1028             |
| 99                                                                    | 0.82025       | 0.27188            | 99                 | 0.30748       | 0.10378            |
| 174                                                                   | 0.78752       | 0.20153            | 174                | 0.40045       | 0.11879            |
| 294                                                                   | 0.76596       | 0.14685            | 294                | 0.46717       | 0.12634            |
| 444                                                                   | 0.78534       | 0.13392            | 444                | 0.5335        | 0.13916            |
| 834                                                                   | 0.8227        | 0.17685            | 834                | 0.6563        | 0.16715            |
| 1434                                                                  | 0.85939       | 0.22565            | 1434               | 0.78796       | 0.19735            |
| 2184                                                                  | 0.89444       | 0.2659             | 2184               | 0.87915       | 0.21801            |
| 3084                                                                  | 0.92486       | 0.29821            | 3084               | 0.92194       | 0.2245             |
